# Supplementary material for: Development of Bisphenol-A-Glycidyl-Methacrylate- and Trimethylolpropane-Triacrylate-Based Stereolithography 3D Printing Materials
Source: Polymers (Basel). 2022 Nov 29;14(23):5198. doi: 10.3390/polym14235198 (PMC9736893; doi:10.3390/polym14235198)
Supplement: Supplementary file 1 [file polymers-14-05198-s001.zip › polymers-2007500-supplementary.pdf]

## Development of Bisphenol-A-Glycidyl-Methacrylate- and Trimethylolpropane-Triacrylate- Based Stereolithography 3D Printing Materials

Yura Choi <sup>1</sup>, Jisun Yoon <sup>1</sup>, Jinyoung Kim <sup>1</sup>, Choongjae Lee <sup>1</sup>, Jaesang Oh <sup>2,\*</sup> and Namchul Cho <sup>1,\*</sup>

<sup>1</sup> Department of Energy Systems Engineering, Soonchunhyang University, Asan 31538, Republic of Korea

<sup>2</sup> Department of Neurosurgery, College of Medicine, Soonchunhyang University, Asan 31538, Republic of Korea

\* Correspondence: metatron1324@hotmail.com (J.O.); chon7@sch.ac.kr (N.C.)

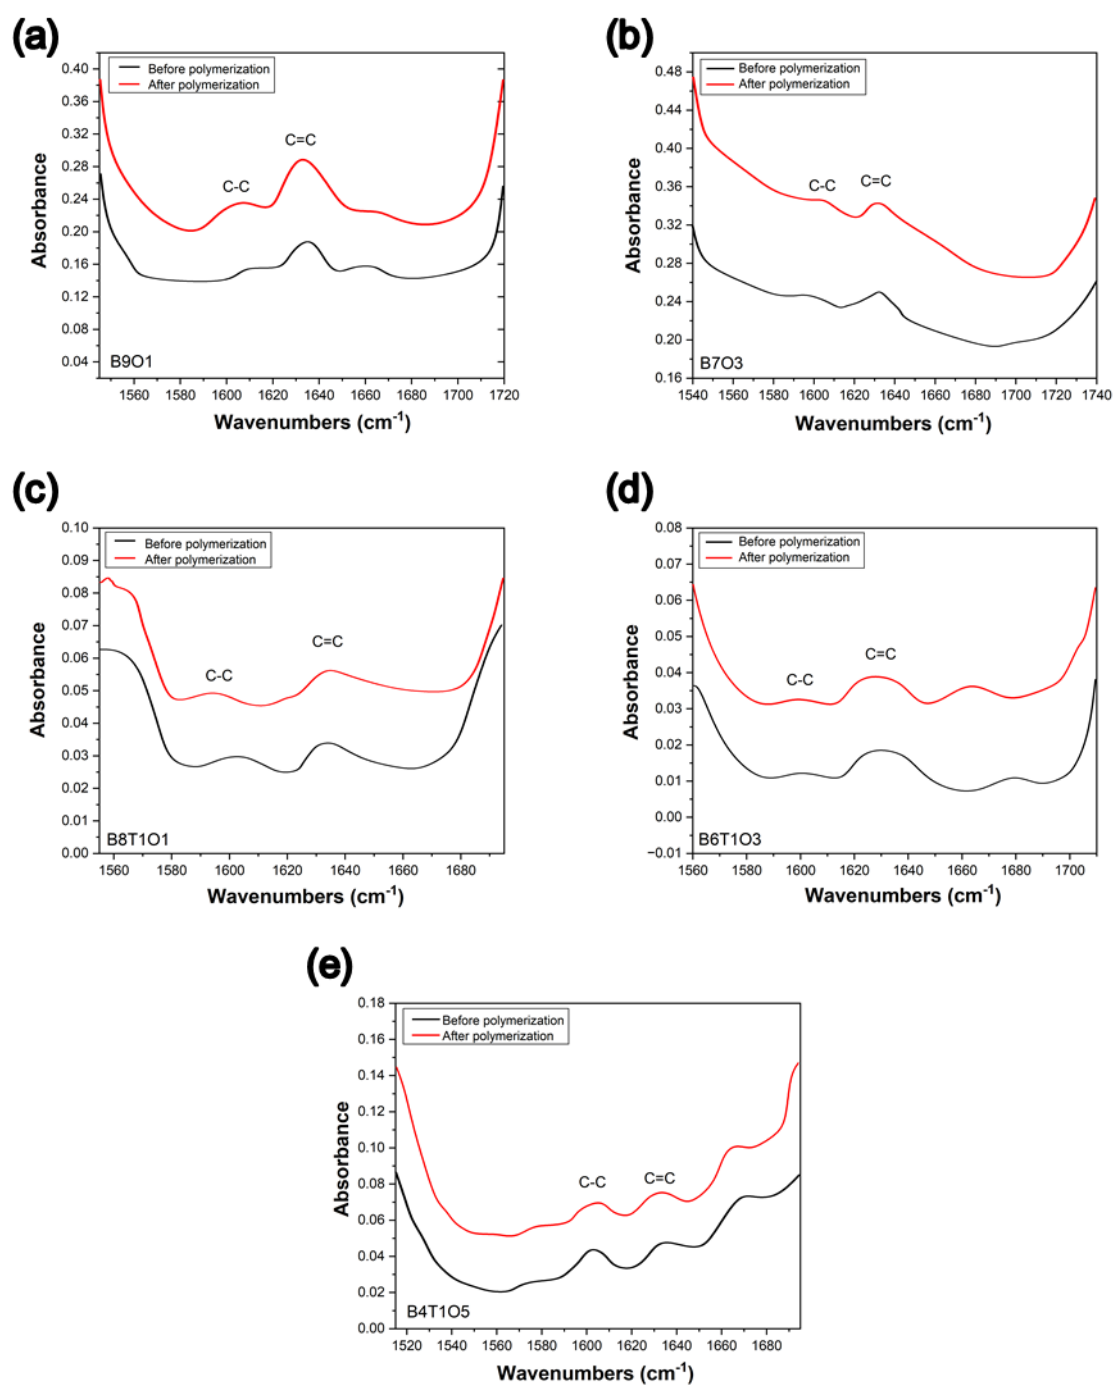

**Figure S1.** FT-IR spectra before and after polymerization showing typical C–C and C=C peaks for (a) B9O1, (b) B7O3, (c) B8T1O1, (d) B6T1O3, and (e) B4T1O5.
